# Supplementary material
Source: Springer Nature journal article supplement (https://www.springermedizin.de/resource/supplementary/12955_2003_55_MOESM2_ESM.pdf/9558464)

### RAOS Pain

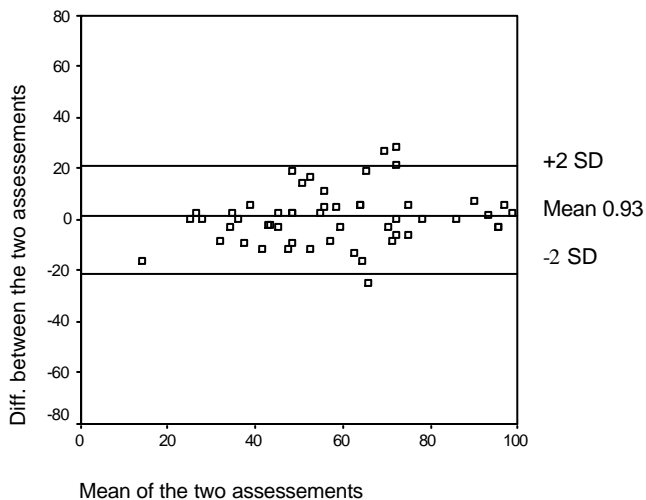

### RAOS Sport/Rec

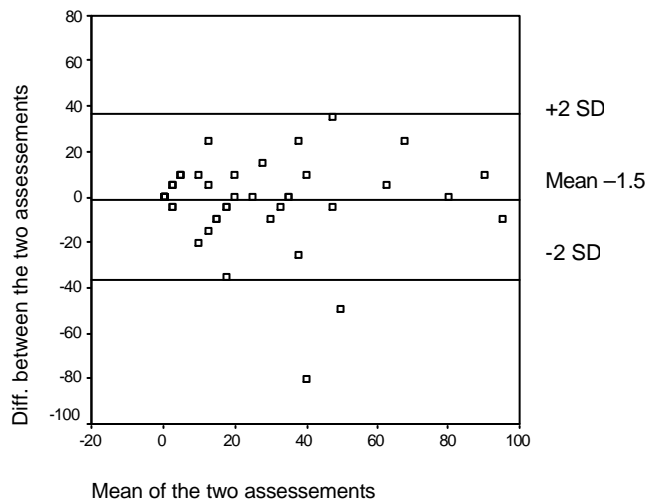

### RAOS Symptoms

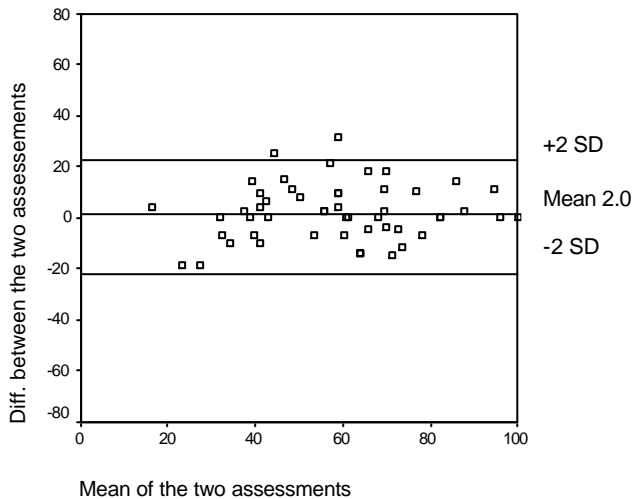

### RAOS QOL

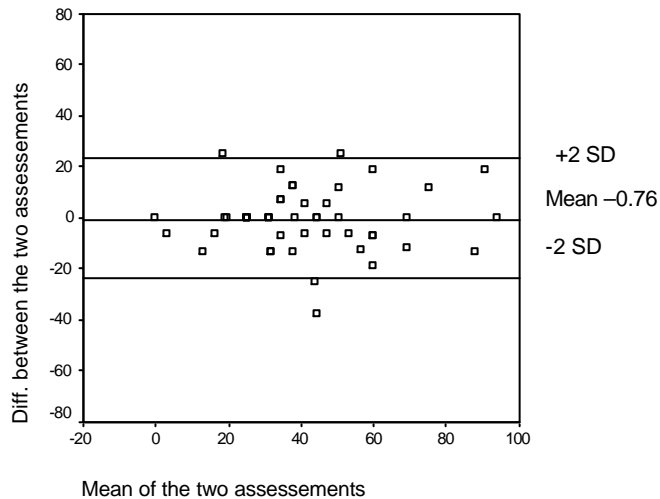

### RAOS ADL

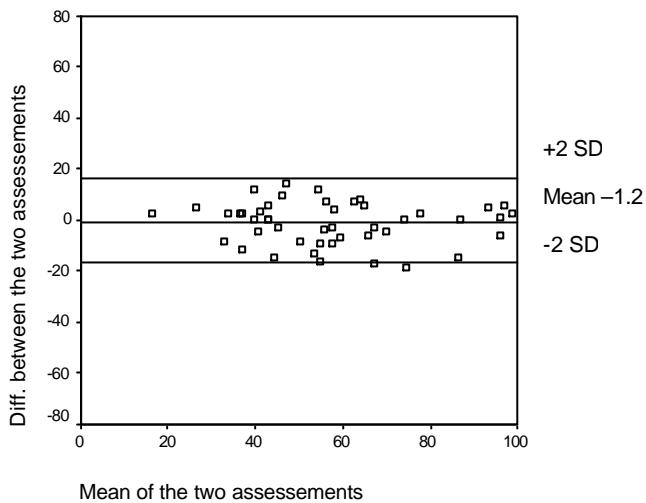

Supplement: MOESM2 [file 9558464]
